# Supplementary material for: Senescence induced by RECQL4 dysfunction contributes to Rothmund–Thomson syndrome features in mice
Source: PubMed Central journal article supplement — Cell Death Dis. 2014 May 15;5(5):e1226–. doi: 10.1038/cddis.2014.168 (PMC4047874; doi:10.1038/cddis.2014.168), 2014-05-15
Supplement: cddis2014168x1.pdf [file cddis2014168x1.pdf]

Supplementary data

**Senescence induced by RECQL4 dysfunction contributes to Rothmund-Thomson Syndrome features in mice**

Huiming Lu<sup>1</sup>, Evandro Fei Fang<sup>1</sup>, Peter Sykora<sup>1</sup>, Tomasz Kulikowicz<sup>1</sup>, Yongqing Zhang<sup>2</sup>, Kevin G. Becker<sup>2</sup>, Deborah L. Croteau<sup>1</sup>, and Vilhelm A. Bohr<sup>1</sup>

<sup>1</sup>Laboratory of Molecular Gerontology, National Institute on Aging, National Institutes of Health, USA, MD 21224

<sup>2</sup>Gene Expression and Genomics Unit, National Institute on Aging, National Institutes of Health, USA, MD 21224

Corresponding author: Vilhelm A. Bohr

Laboratory of Molecular Gerontology  
Biomedical Research Center, Room 06B133A  
251 Bayview Boulevard, Suite 100  
Baltimore, MD 21224-6825  
Phone: 410-558-8162  
Fax: 410-558-8157  
Email: vbohr@nih.gov

Running title: RECQL4 prevents senescence in human cells and mice

### Figure legends

**Figure S1 Knockdown of BLM, WRN and RECQL4 induces cellular senescence in primary fibroblast cells.** Knockdown of each RecQ helicase by lentivirus-mediated shRNA in human primary fibroblast cells (GM00969, passage 19). (A) knockdown efficiencies were measured by qPCR. (B) Images of SA- $\beta$ -gal stained cells. (C) Quantitation of SA- $\beta$ -gal stained cells. Data are from three independent replicates. Student T-test were performed for statistical analysis in this paper. \*,  $p < 0.05$ ; \*\*\*,  $p < 0.001$ .

**Figure S2 Knockdown of BLM, WRN or RECQL4-induced cell senescence in telomerase positive cells.** The five RecQ helicases were knocked down by lentivirus-mediated shRNA in human primary fibroblast cells BJ and its hTERT-immortalized derivative BJ-5TA. The remaining mRNA of RecQ helicases in BJ (A) and BJ-5TA (C) were confirmed by RT-PCR. Senescence in RecQ helicases-depleted BJ (B) and BJ-5TA (D) were measured by SA- $\beta$ -gal staining. Data are from three independent replicates. \*,  $p < 0.05$ ; \*\*,  $p < 0.01$ ; \*\*\*,  $p < 0.001$ .

**Figure S3 Apoptosis did not increase in RecQ helicase-deficient human fibroblast cells.** RecQ helicases were depleted by shRNA-mediated knockdown in human primary fibroblast cells GM05565 at passage 11. After selection with puromycin, cells were submitted for apoptosis analysis using propidium iodide and Annexin V FACS staining and FACS analysis.

**Figure S4 Oxidative stress from high oxygen culture conditions promotes senescence in RecQ helicase-deficient fibroblast cells.** RecQ helicase were knocked down in primary human fibroblast cell lines GM00969 at passage 19 and the cells were cultured under low oxygen (3%) or high oxygen (20%) culture conditions for six days. (A) Remaining mRNA of RecQ helicases in GM00969 were measured by qPCR; (B) Quantitation of SA- $\beta$ -gal stained cells in RecQ helicase-depleted as well as scramble shRNA treated cells. Data are from three independent replicates. \*,  $p < 0.05$ ; \*\*,  $p < 0.01$ ; \*\*\*,  $p < 0.001$ .

**Figure S5 Increased  $\gamma$ H2AX foci in primary fibroblast cells after RecQ helicase loss.** RecQ helicases were depleted by lentivirus-mediated shRNA in human primary fibroblast cell line GM05565 at passage 11. The cells in the experiments were six days after transfection of lentivirus. (A) The indicated cell lines were immunostained with  $\gamma$ H2AX antibody. Bar scale is 20  $\mu$ m. (B) Percentage of cells with 5 or more  $\gamma$ H2AX foci in the indicated cell lines as in Panel A.

**Figure S6 Loss of BLM, WRN or RECQL4 caused similar transcriptome pathway changes.** RecQ helicases were knocked down in primary human fibroblast cell line GM05565 at passage 11, and six days after transfection of lentivirus the cells were processed for RNA extraction and microarray analysis. Data are from three independent biological replicates. (A) A principal component analysis (PCA) of the unselected average gene expression Z-score from each RecQ helicase knockdown and control samples ( $n=3$ ). (B) Number of up-/ down-regulated pathway in

BLM-, WRN-, or RECQL4-depleted cells. **(C)** Cluster of the top 100 canonical pathways that displayed the greatest Z-score in RecQ helicase-depleted cells compared with controls.

**Figure S7 Cluster of the top 100 canonical pathways affected in RecQ helicase depleted fibroblast cells.** RecQ helicases were knocked down in primary human fibroblast cell line GM05565 at passage 11, and six days after transfection of lentivirus the cells were processed for RNA extraction and microarray analysis. Cluster of the top 100 canonical pathways that displayed the greatest Z-score from controls. Data are from three independent biological replicates.

Figure S1

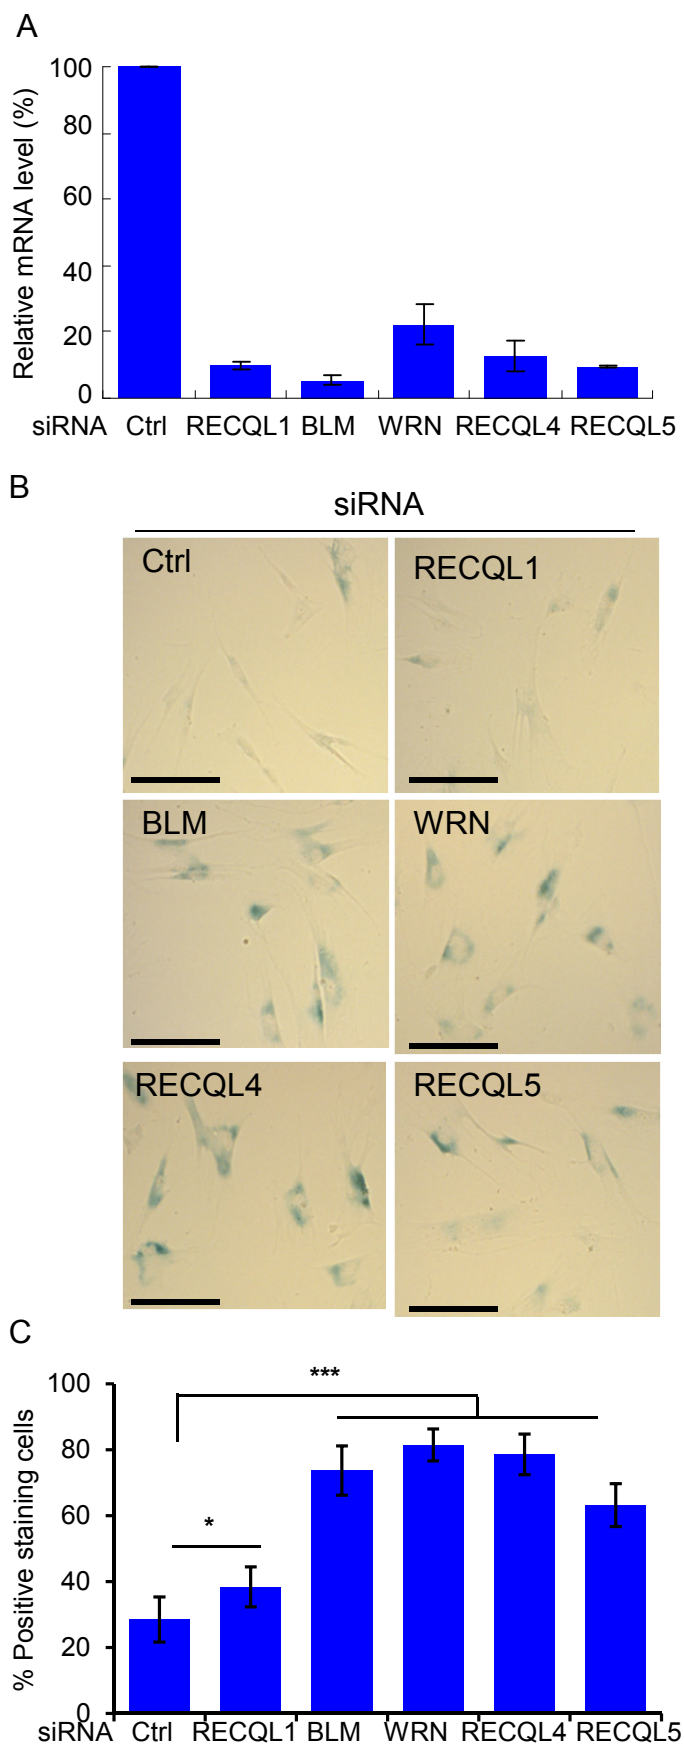

Figure S2

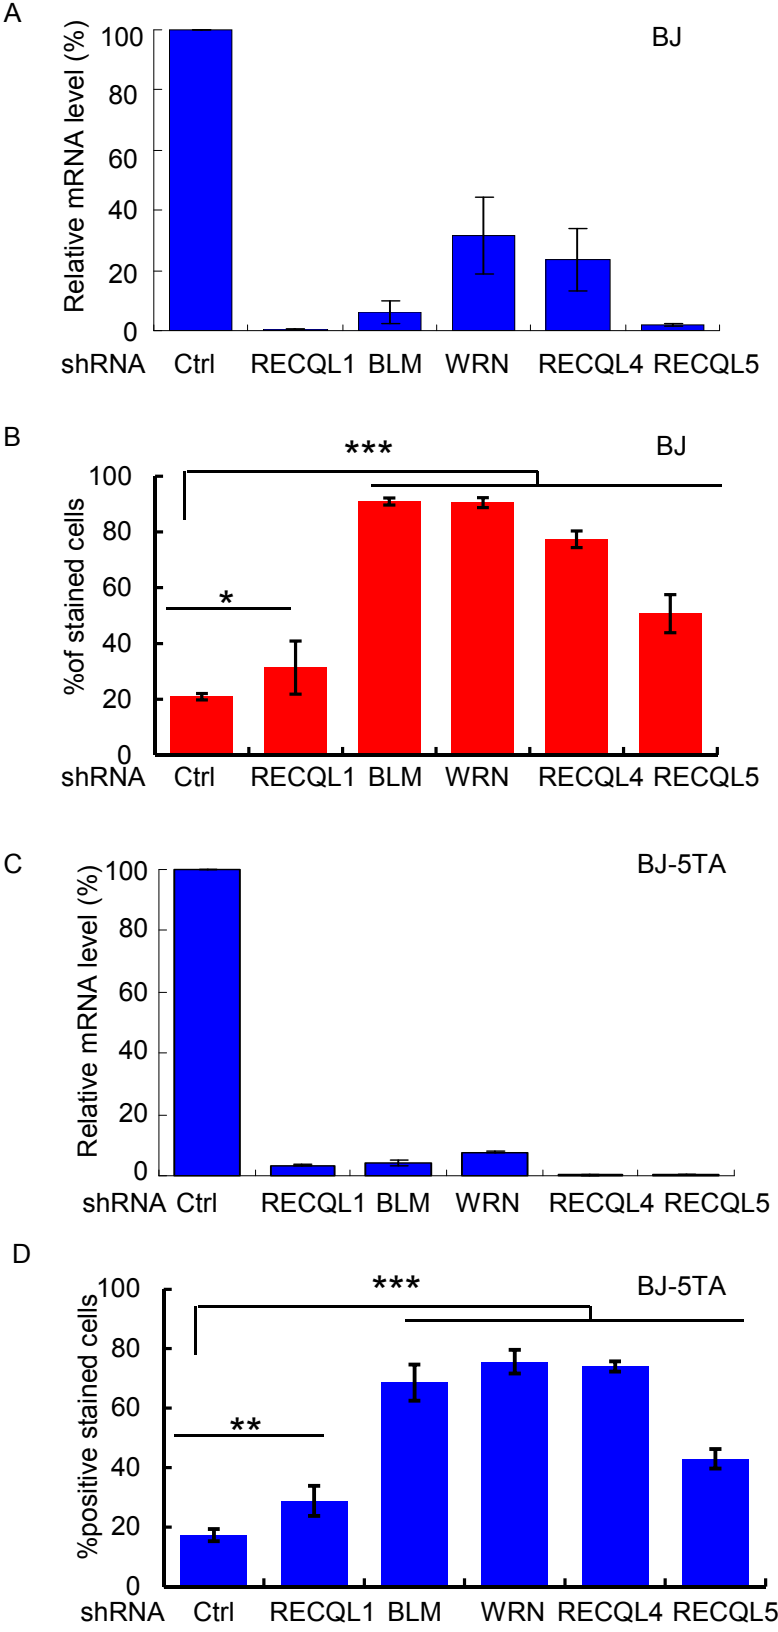

Figure S3

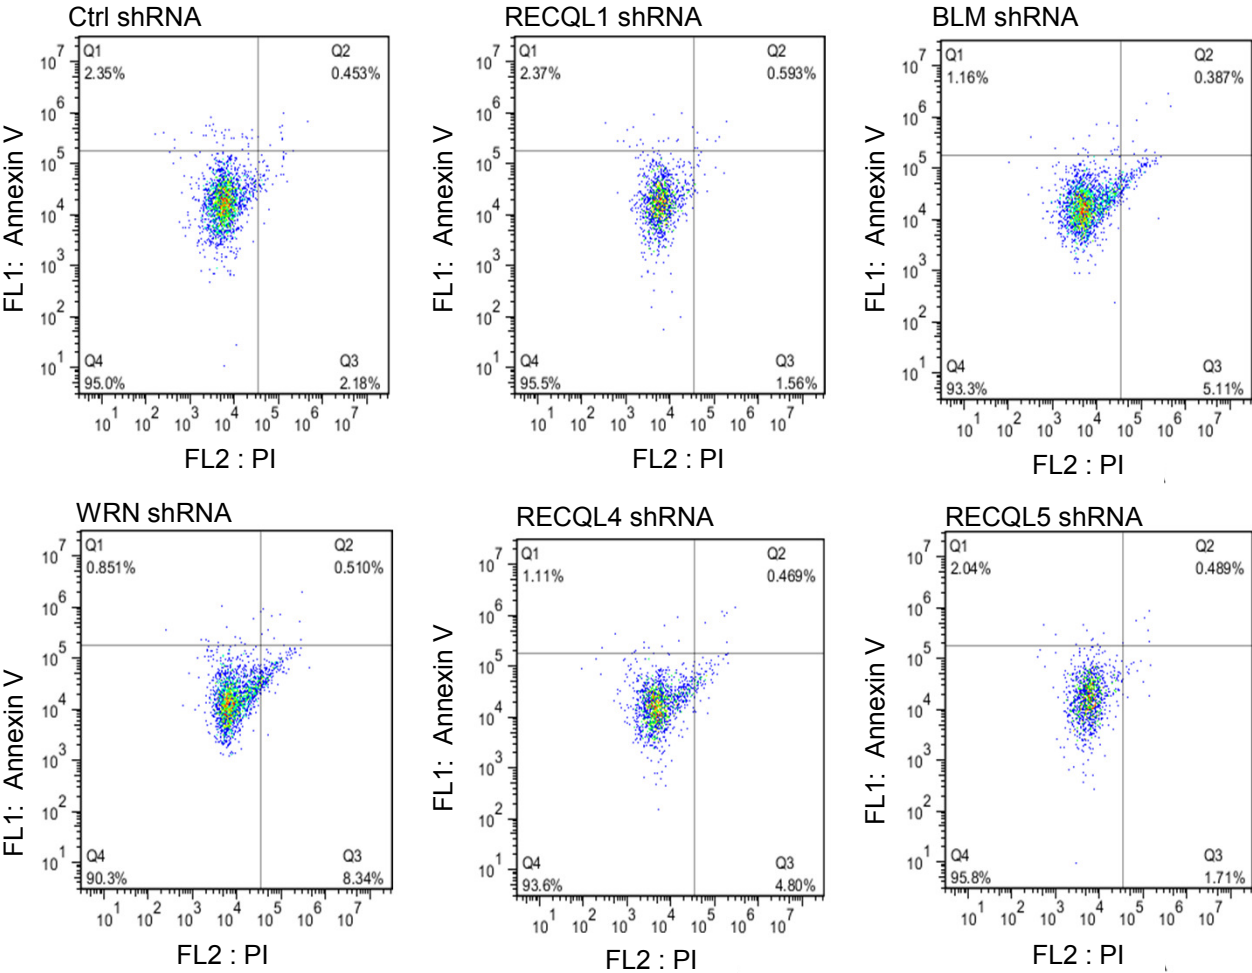

Figure S4

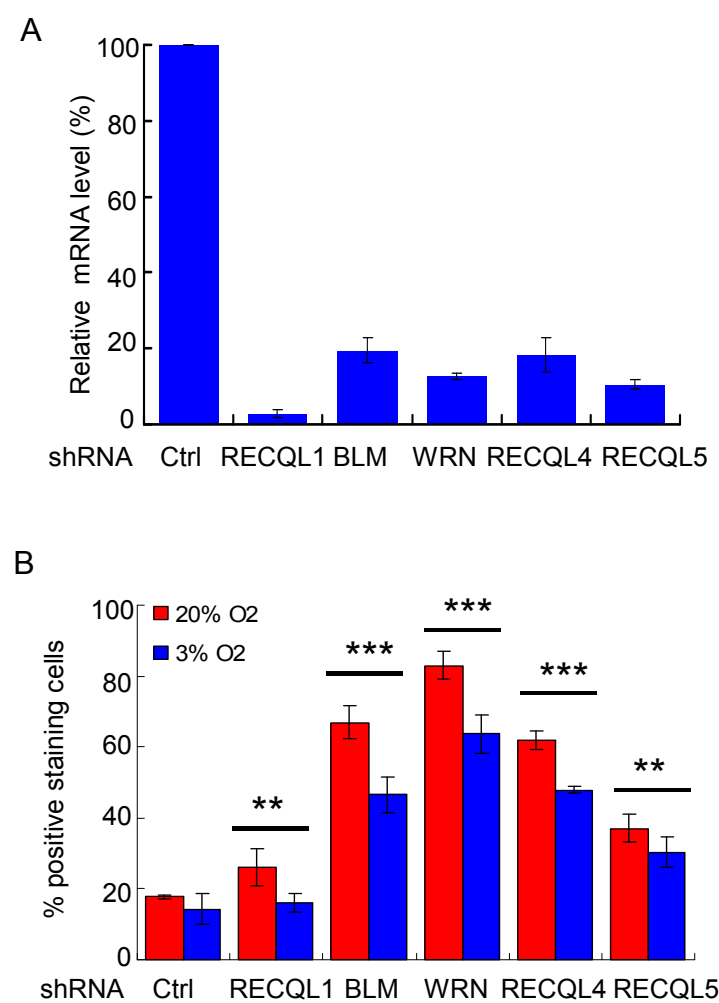

Figure S5

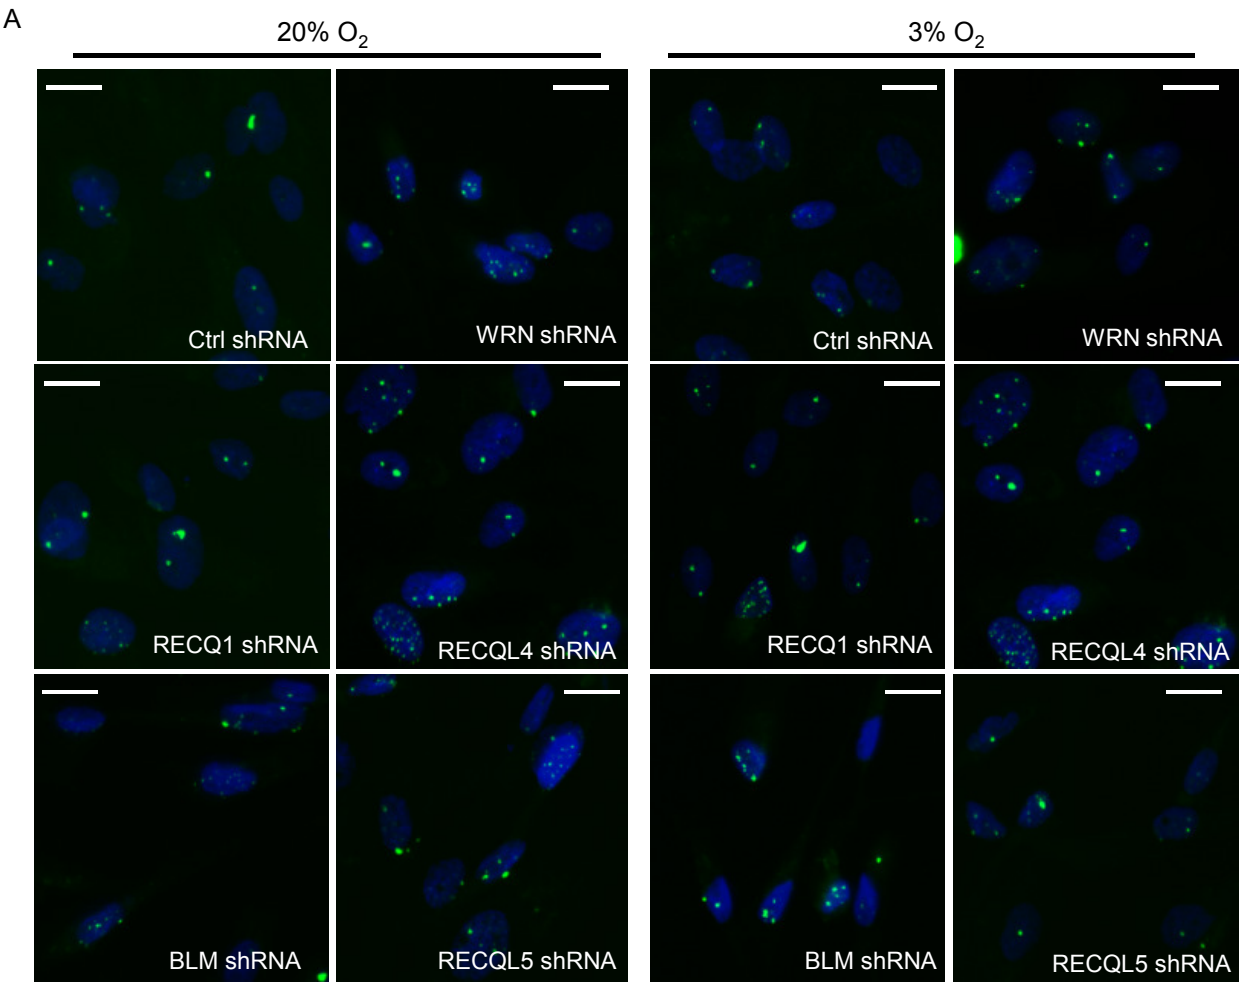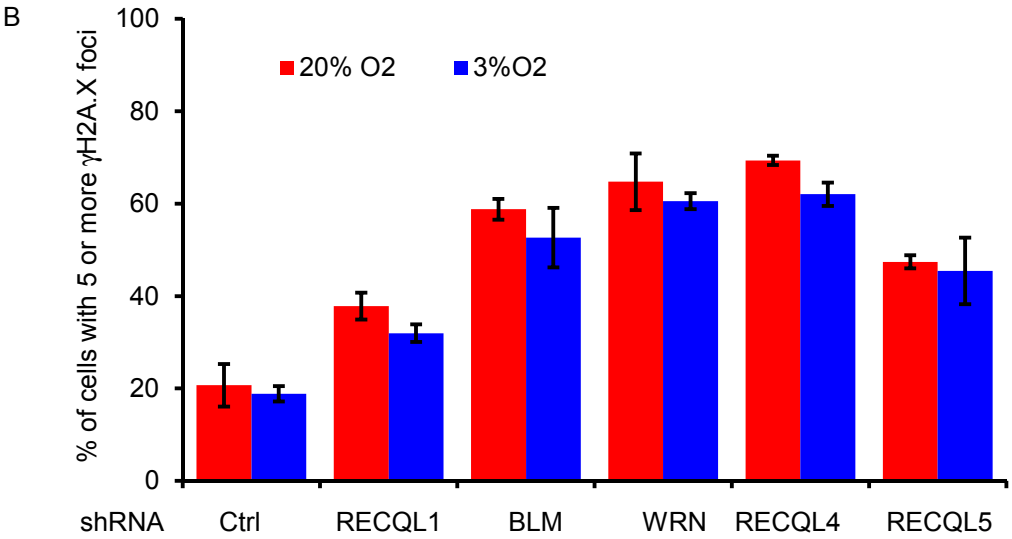

Figure S6

A

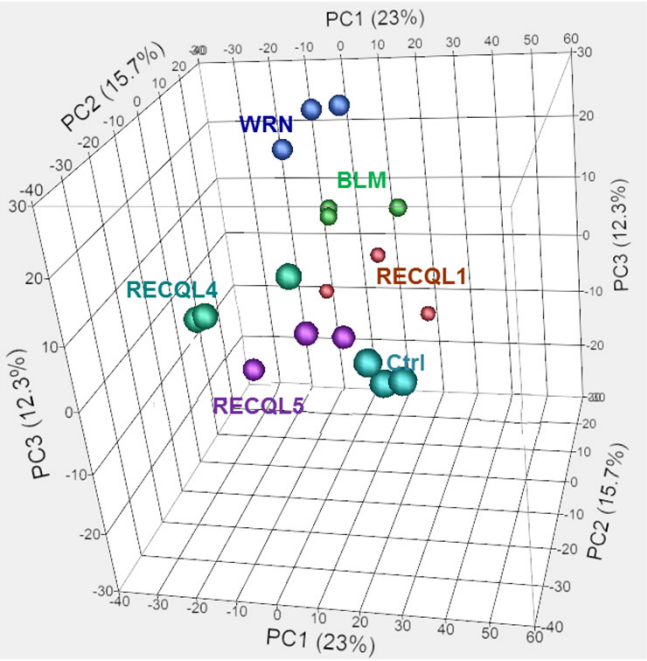

B

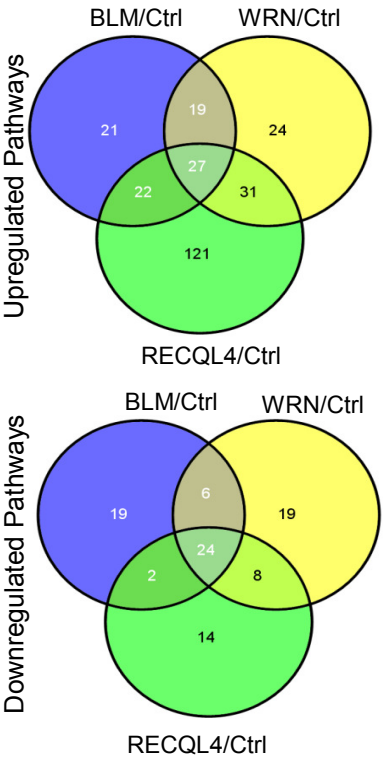

C

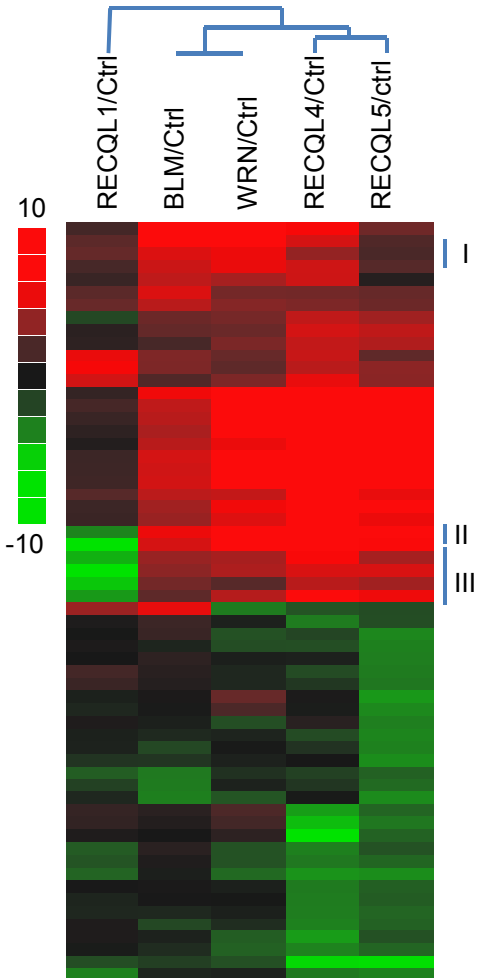

| Part | Pathways                   |
|------|----------------------------|
| I    | Packaging of telomere ends |
|      | Telomere maintenance       |
| II   | Oxidative phosphorylation  |
|      | Electron transport chain   |
| III  | Parkinson's Disease        |
|      | Diabetes' pathways         |
|      | Alzheimer's Disease        |
|      | Huntington's Disease       |

Figure S7

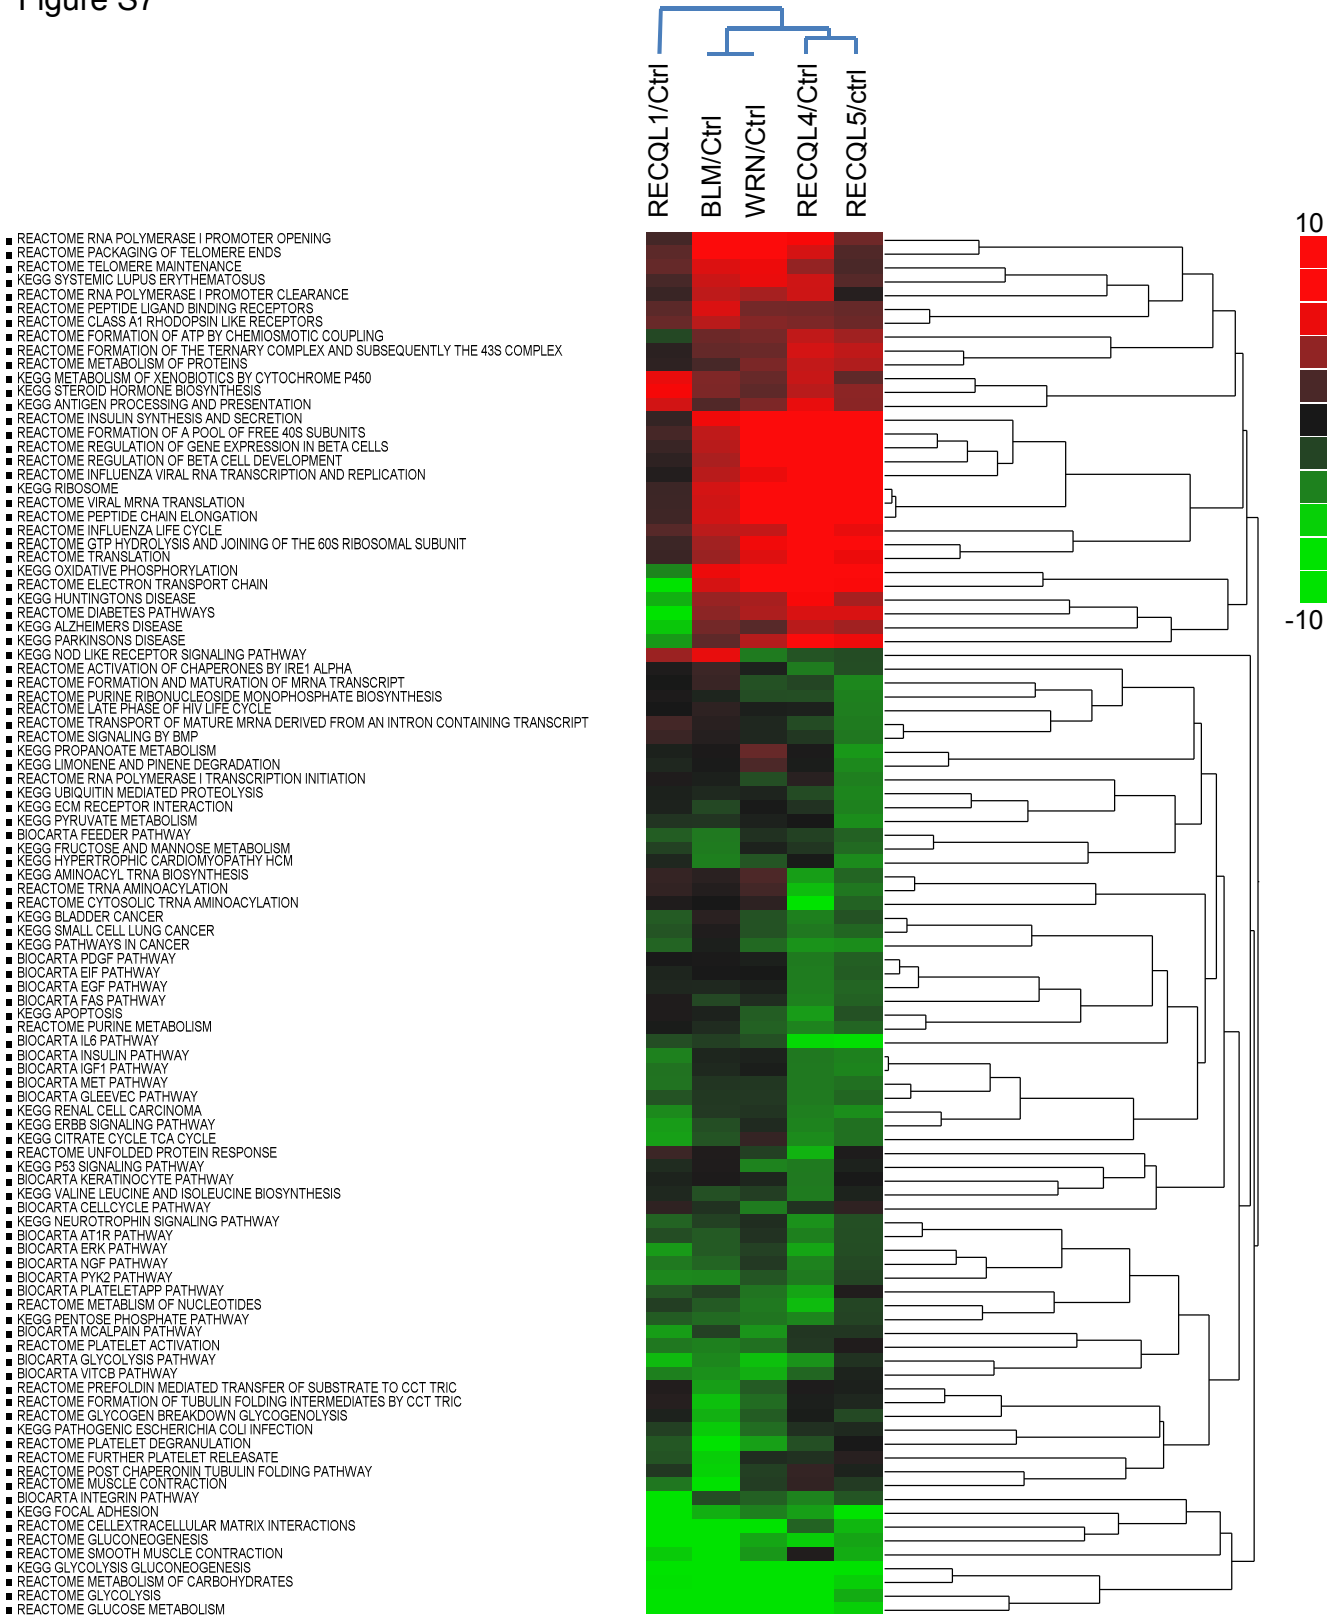

**Table S1 Number of genes with changed transcriptional level in response to deletion of individual RecQ helicases in human primary fibroblasts**

| Analysis Set              | Up-regulated genes |            | Down-regulated genes |            |
|---------------------------|--------------------|------------|----------------------|------------|
|                           | Number             | Percentage | Number               | Percentage |
| RECQL1 shRNA/Ctrl shRNA   | 1478               | 4.67%      | 1423                 | 4.50%      |
| BLM shRNA/ Ctrl shRNA     | 1302               | 4.11%      | 1292                 | 4.10%      |
| WRN shRNA/ Ctrl shRNA     | 1492               | 4.71%      | 1500                 | 4.74%      |
| RECQL4 shRNA / Ctrl shRNA | 1156               | 3.66%      | 1580                 | 5.00%      |
| RECQL5 shRNA / Ctrl shRNA | 1166               | 3.69%      | 1835                 | 5.80%      |

**Table S2 Information of siRNA, shRNA and primers used in this study.**

| Name                           | Sequence                                                            | Source        | Cat. No        | Ref                               |                         |
|--------------------------------|---------------------------------------------------------------------|---------------|----------------|-----------------------------------|-------------------------|
| shRNA targeting RecQ helicases |                                                                     |               |                |                                   |                         |
| Control shRNA                  | 5'CCTAAGGTTAAGTCGCCCTCGCTCGAGCGAGGGCGA<br>CTTAACCTTAGG3'            | Addgene       | plasmid# 1864  | (Sarbasso<br>v et al.,<br>2005)   |                         |
| RECQL1 shRNA                   | 5'CCGGGCACATGCTATTACTATGCAACTCGAGTTGCA<br>TAGTAATAGCATGTGCTTTTTG 3' | Sigma-Aldrich | TRCN0000289591 | (Sharma<br>and Brosh,<br>2007)    |                         |
| BLM shRNA                      | CCGGCGCTTATGTGATGCTCGGAAACTCGAGTTTCCG<br>AGCATCACATAAGCGTTTTT       |               | TRCN0000004906 | (Popuri et<br>al.)                |                         |
| WRN shRNA                      | 5'CCGGCCTGTAAGATTGCTTTAAGAACTCGAGTTCTT<br>AAAGCAATCTTACAGGTTTTT3'   |               | TRCN0000004899 | This study                        |                         |
| RECQL4 shRNA                   | 5'CCGGCCTCGATTCCATTATCATTTACTCGAGTAAAT<br>GATAATGGAATCGAGGTTTTTG3'  |               | TRCN0000051169 | (Singh et<br>al., 2012)           |                         |
| RECQL5 shRNA                   | 5'CCGGCCCTAAAGGTACGAGTAAGTTCTCGAGAACTT<br>ACTCGTACCTTTAGGGTTTTT3'   |               | TRCN0000051415 | (Ramamo<br>orthy et<br>al., 2012) |                         |
| siRNA                          |                                                                     |               |                |                                   |                         |
| Control siRNA                  | ON-TARGETplus Non-targeting siRNA #1                                | Dharmacon     | D-001810-01-05 | (Singh et<br>al., 2012)           |                         |
| siRECQL1                       | 5'GCAAGGAGAUUUACUCGAA3'                                             |               | Custom design  | (Sharma<br>and Brosh,<br>2007)    |                         |
| siBLM                          | 5'GGGAAGACAUAUAUGCAUAA3'                                            |               |                |                                   | This study              |
| siWRN                          | 5'GUGUAUAGUUACGAUGCUAGUGA3'                                         |               |                |                                   | This study              |
| siRECQL4                       | 5'CAUACAGCUUACCGUACA3'                                              |               |                |                                   | (Singh et<br>al., 2012) |
| siRECQL5                       | 5'CCCTAAAGGTACGAGTAAGTT3'                                           |               |                |                                   | This study              |
| siRECQL4 UTR-1                 | 5'GCTCCAAAATGCAGAATAA3'                                             |               |                |                                   | This study              |
| siRECQL4 UTR-2                 | 5'ACTGAGGACCTGGGCAAAA3'                                             |               |                |                                   | This study              |
| Primers for RT-PCR             |                                                                     |               |                |                                   |                         |
| RECQL1-RT-PF                   | 5'TGAAGGGTCAAGGGAGGA3'                                              | Custom design |                | This study                        |                         |
| RECQL1-RT-PR                   | 5'TCCAAATTTGTTTCTAAAATAATCCA3'                                      |               |                |                                   |                         |

|                                                                      |                                                                  |  |            |
|----------------------------------------------------------------------|------------------------------------------------------------------|--|------------|
| BLM-RT-PF                                                            | 5'TTTATCCTGATGCCGACTGG3'                                         |  |            |
| BLM-RT-PR                                                            | 5'ACCCAGGAGAAACACAGG3'                                           |  |            |
| WRN-RT-PF                                                            | 5'TGCAGCCATTTCTTGTCAAA3'                                         |  |            |
| WRN-RT-PR                                                            | 5'GAAGGACAGTAGATGATTGTTGGA3'                                     |  |            |
| RECQL4-RT-PF                                                         | 5'GGCCGCTACTTTGAGGAAG3'                                          |  |            |
| RECQL4-RT-PR                                                         | 5'TCCTCCCAATCCTGGAGTCT3'                                         |  |            |
| RECQL5-RT-PF                                                         | 5'ACAAAGCATCTGATAAAGCCAC3'                                       |  |            |
| RECQL5-RT-PR                                                         | 5'TCGTCATACCTGCTGAAGTC3'                                         |  |            |
| GAPDH-RT-PF                                                          | 5'GCCACATCGCTCAGACAC3'                                           |  |            |
| GAPDH-RT-PR                                                          | 5'GCCCAATACGACCAATCC3'                                           |  |            |
| <b>Primers for constructing plasmids expressing RecQL4 fragments</b> |                                                                  |  |            |
| hRQ4-F1-NotI                                                         | 5'TTAATGGCGGCCGCACCATG GAGC3'                                    |  | This study |
| hRQ4 R447 NLS                                                        | 5'TATACTCGAGTACCTTTCTCTTCTTTTTTGGGTCCAG<br>GCTGGGCACCTCAG3'      |  |            |
| hRQ4 F447                                                            | 5'TTAATGGCGGCCGCACCATGGACCCACCGTGCTGC<br>CAC3'                   |  |            |
| hRQ4 R860 NLS                                                        | 5'TATACTCGAGTACCTTTCTCTTCTTTTTTGGCGGCCT<br>GGTGCAGGTGCAG3'       |  |            |
| hRQ4 F863                                                            | 5'TTAATGGCGGCCGCACCGAGCAGGAAGGGGCCGTG3<br>,                      |  |            |
| hRQ4 R1208 NLS                                                       | 5'TATACTCGAGTACCTTTCTCTTCTTTTTTGGGCGGGC<br>CACCTGCAGGAG3'        |  |            |
| hRQ4Δ448-860-PF                                                      | 5'ACTCAGTAAAGCTTTACCTTTCTCTTCTTTTTTGGGT<br>CCAGGCTGGGCACCTCAG 3' |  |            |
| hRQ4Δ448-860-PR                                                      | 5'CAGCCTTAATGGAAGCTTGCCGAGCAGGAAGGGGC<br>CGTG 3'                 |  |            |
| pCMV4A-<br>3XFLAG-fwd                                                | 5'GATTATAAAGATCATGACATCGATTACAAGGATGAC<br>GACGAT3'               |  |            |
| pCMV4A-<br>3XFLAG-rev                                                | 5'ACCGTCATGGTCTTTGTAGTCCTCGAGGTCGACGGT<br>ATCGAT3'               |  |            |
| RecQ4-NotI-Kozak-<br>fwd                                             | 5'GAGATTGCGGCCGCACCATGGAGCGGCTGCGGGAC<br>GT3'                    |  |            |
| RecQ4-XhoI-<br>nostop-rev                                            | 5'GAGATTCTCGAGGCGGGCCACCTGCAGGAGCT3'                             |  |            |

Reference:

- Popuri, V., J. Huang, M. Ramamoorthy, T. Tadokoro, D.L. Croteau, and V.A. Bohr. RECQL5 plays co-operative and complementary roles with WRN syndrome helicase. *Nucleic Acids Res* 41:881-899.
- Ramamoorthy, M., T. Tadokoro, I. Rybanska, A.K. Ghosh, R. Wersto, A. May, T. Kulikowicz, P. Sykora, D.L. Croteau, and V.A. Bohr. 2012. RECQL5 cooperates with Topoisomerase II alpha in DNA decatenation and cell cycle progression. *Nucleic Acids Res* 40:1621-1635.
- Sarbassov, D.D., D.A. Guertin, S.M. Ali, and D.M. Sabatini. 2005. Phosphorylation and regulation of Akt/PKB by the rictor-mTOR complex. *Science* 307:1098-1101.
- Sharma, S., and R.M. Brosh, Jr. 2007. Human RECQ1 is a DNA damage responsive protein required for genotoxic stress resistance and suppression of sister chromatid exchanges. *PLoS One* 2:e1297.
- Singh, D.K., V. Popuri, T. Kulikowicz, I. Shevelev, A.K. Ghosh, M. Ramamoorthy, M.L. Rossi, P. Janscak, D.L. Croteau, and V.A. Bohr. 2012. The human RecQ helicases BLM and RECQL4 cooperate to preserve genome stability. *Nucleic Acids Res* 40:6632-6648.
